# Supplementary material for: Application of Nanotrap technology for high sensitivity measurement of urinary outer surface protein A carboxyl-terminus domain in early stage Lyme borreliosis
Source: PubMed Central journal article supplement (PMC4634744; doi:10.1186/s12967-015-0701-z), 2015-11-04
Supplement: 12967_2015_701_MOESM1_ESM.pdf [file 12967_2015_701_MOESM1_ESM.pdf]

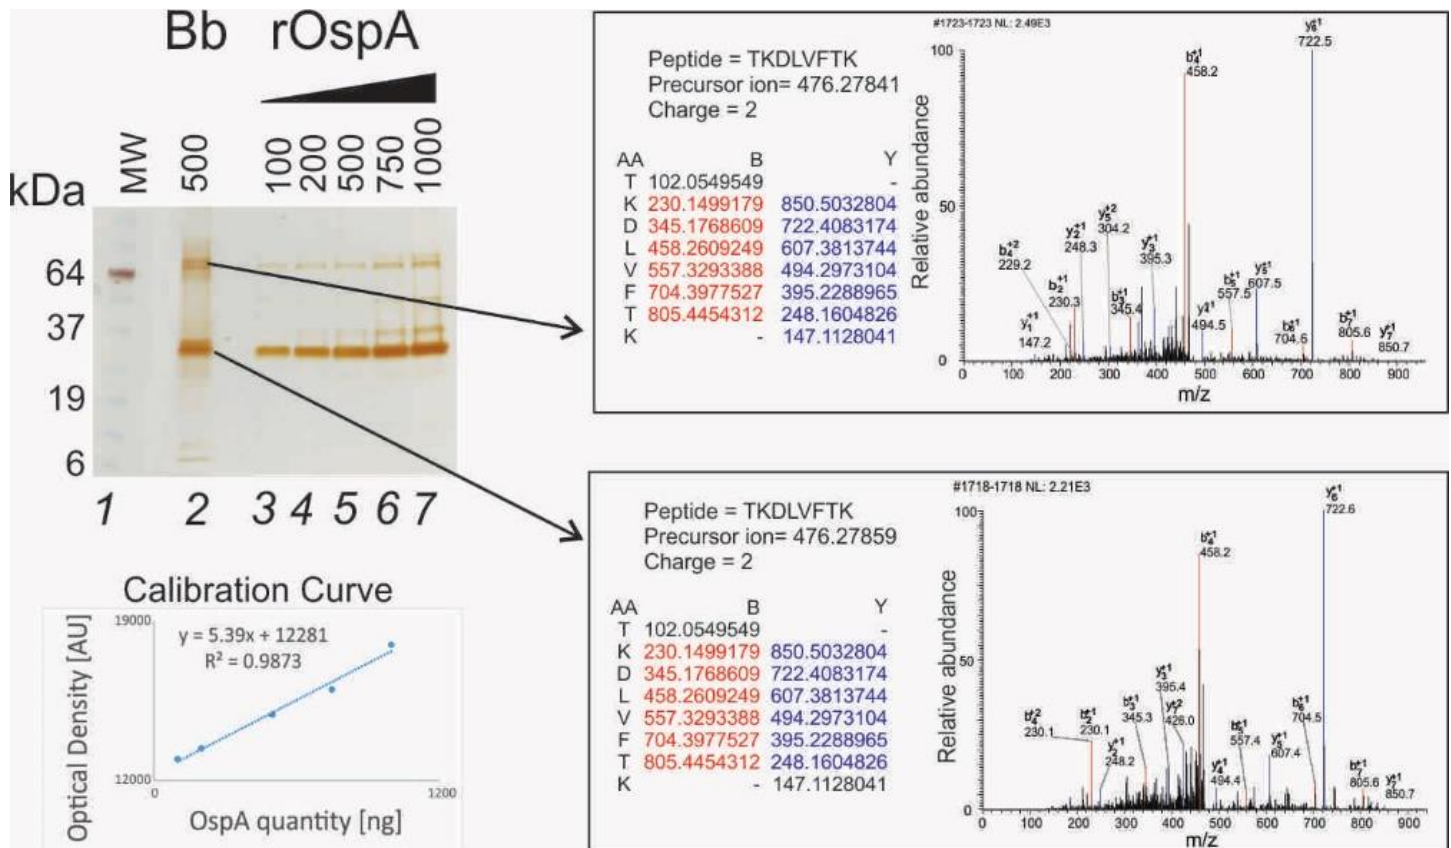

**Figure S1:** 81% of the total protein present in Bb Lyme antigen Grade 2 (American Research Products) is constituted by OspA. A dilution of a recombinant purified OspA protein (Genecopoeia) was analyzed by SDS PAGE and silver staining (100-to 1,000 ng, *Lanes 3-7*). The band intensities were quantified using ImageJ software and a calibration curve was built (insert graph). A linear regression curve was fitted ( $y=5.39x+12281$ ,  $R^2 = 0.9873$ ). 500 ng of Bb Lyme antigen Grade 2 were loaded on the gel (*Lane 2*) and compared to the recombinant OspA calibration curve (*Lanes 3-7*). From this procedure it derived that 81% of Bb Lyme antigen Grade 2 total protein content is OspA. In gel protein digestion and mass spectrometry (MS) analysis verified the predominant presence of tryptic peptides belonging to OspA in the bands at ~30 kDa and ~60kDa present both in the Bb Lyme antigen Grade 2 and in the recombinant OspA. In particular, tryptic peptides containing the epitope for mAb clone 0551 OspA236-239 were present in both bands (MS-MS spectra are reported in the insert).

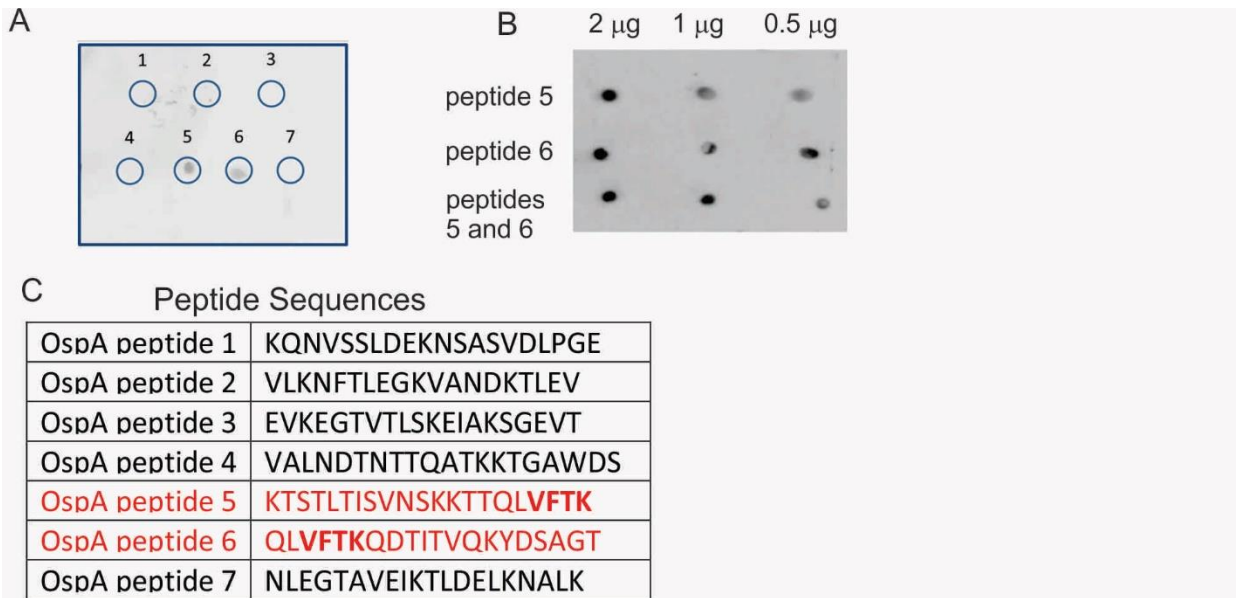

**Figure S2.** Narrow OspA236-239 region binds to mAb clone 0551 with high specificity. Dot blot analysis revealed that only 2 out of 7 synthetic peptides with sequence reported in Table S1 show reactivity with the anti OspA monoclonal antibody clone 0551 used in this study.

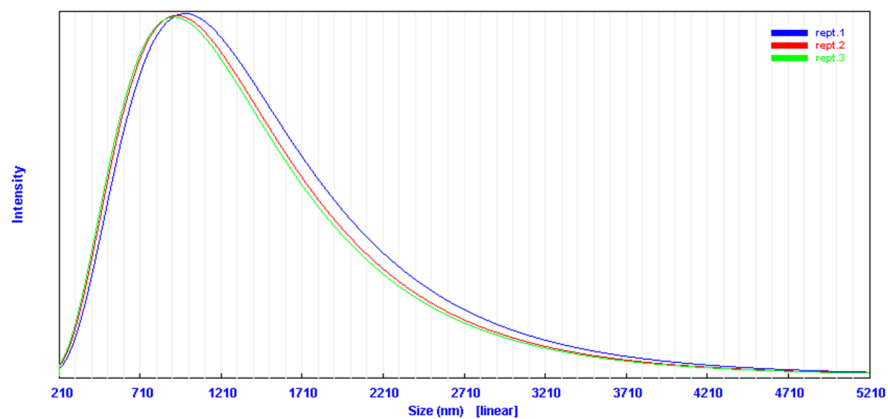

**Figure S3.** Light scattering analysis was used to determine the hydrodynamic diameter of the Nanotrap particles. As reported in Table S2, the hydrodynamic diameter of the Nanotrap particles was 1054.7 +/- 31.11 nm.

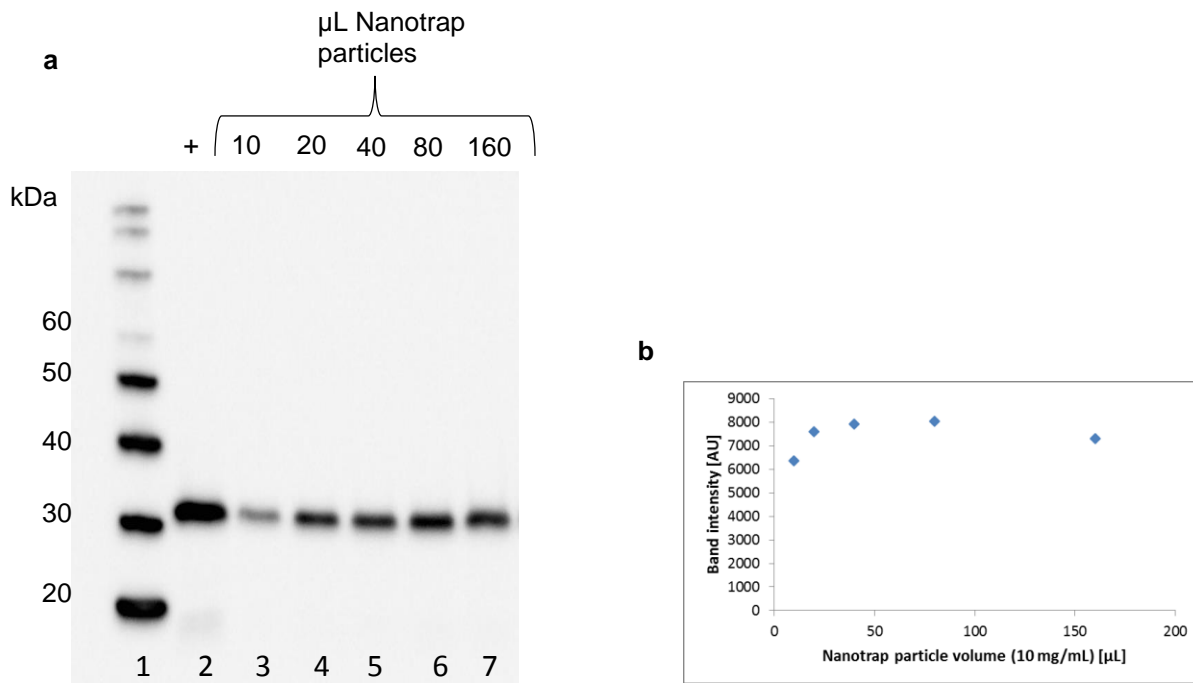

**Figure S4.** A V/v ratio ( $V$ =Nanotrap suspension volume,  $v$ =sample volume) of 1/10 was optimized in order to maximize Lyme antigen capturing. **a** 2 ng of Lyme antigen was spiked in 500  $\mu$ L urine aliquots. Urine samples were incubated with increasing amount of Nanotrap particle suspension (10-160  $\mu$ L of Nanotrap at 5 mg/mL concentration). *Lanes 1*) ladder; 2) Positive control (OspA 1ng); 3) 10 $\mu$ L of Nanotrap particles; 4) 20  $\mu$ L Nanotrap particles; 5) 40 $\mu$ L Nanotrap particles; 6) 80  $\mu$ L Nanotrap particles; 7) 160 $\mu$ L Nanotrap particles; **b** Band intensity was measured with ImageJ, plateau is reached with > 40 $\mu$ L of Nanotrap particles.

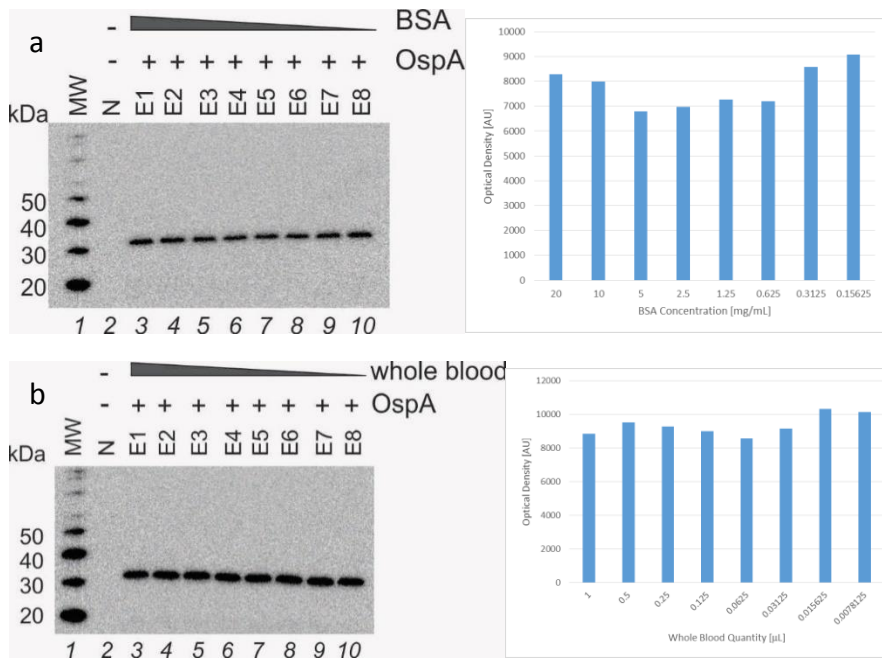

**Figure S5.** Interfering substances: the presence of a high amount of protein and blood in the urine does not interfere with Lyme antigen capture and detection. **a** 320 pg of Lyme antigen was spiked in samples of 40 mL of human urine. We tested the interference of albumin present in excess up to  $10^8$  fold. Increasing amounts of bovine serum albumin ranging from 0.31 mg/mL to 20 mg/mL were added to 40 mL of OspA containing human urine; urine samples were processed with Nanotrap particles. Ability of the Nanotrap particles to sequester OspA is not affected by increasing concentration of competing proteins in urine. *Lanes:* 1) ladder; 2) volunteer human urine in absence of OspA antigen (negative control); 3) OspA + BSA 20 mg/mL; 4) OspA + BSA 10 mg/mL; 5) OspA + BSA 5 mg/mL; 6) OspA + BSA 2.5 mg/mL; 7) OspA + BSA 1.25 mg/mL; 8) OspA + BSA 0.625 mg/mL; 9) OspA + BSA 0.31 mg/mL; 10) OspA + BSA 0.15 mg/mL. **b** Lyme antigen 320 pg was spiked in urine samples (40 mL). Increasing amounts of whole blood from 0.015  $\mu$ L to 1  $\mu$ L was added to the urine samples; urine samples were processed with Nanotrap particles and analyzed using western blot. *Lanes:* 1) ladder; 2) volunteer human urine in absence of OspA antigen (negative control); 3) OspA + 1  $\mu$ L whole blood; 4) OspA + 0.5  $\mu$ L whole blood; 5) OspA + 0.25  $\mu$ L whole blood; 6) OspA + 0.125  $\mu$ L whole blood; 7) OspA + 0.062  $\mu$ L whole blood; 8) OspA + 0.031  $\mu$ L whole blood; 9) OspA + 0.015  $\mu$ L whole blood; 10) OspA + 0.007  $\mu$ L whole blood.

Note: Bilirubin, which we screen against in the urine against in the urine dipstick prior to analysis, does not cause any interference with the Nanotrap based test for the following two reasons. Firstly, the Nanotrap particle urine OspA test uses chemiluminescence solid phase based detection whereas bilirubin is known to interfere with absorbance readings at  $\lambda \sim 456$  nm [Clin Biochem Rev Vol 29 Suppl (i) August 2008 | S43] in solution-phase homogeneous assays. Secondly, the molecular weight of bilirubin is  $\sim 500$  Da. This means that bilirubin is too small to be retained in the SDS PAGE system (Tris Gly 4-20%) we use to detect the OspA antigen. Bilirubin would migrate out of the gel during the electrophoretic run necessary to separate the proteins, which have a much higher molecular weight (10,000 – 100,000 Da). The presence of abnormally high proteins in the urine of patients, as happens in the in the rare disorder of monoclonal gammopathy (3% incidence in general population  $>50$  yo, decreasing with decreasing age), does not interfere with the Nanotrap OspA test as demonstrated in

Figure S5. The exquisite specificity of the test is ensured by the specificity of the anti OspA monoclonal antibody and by the two-step test that includes a competition assay for each positive result. This competition assures that immunoreactivity with the antigen can be clearly differentiated from the rare possibility of background caused by immunoglobulins in the urine.

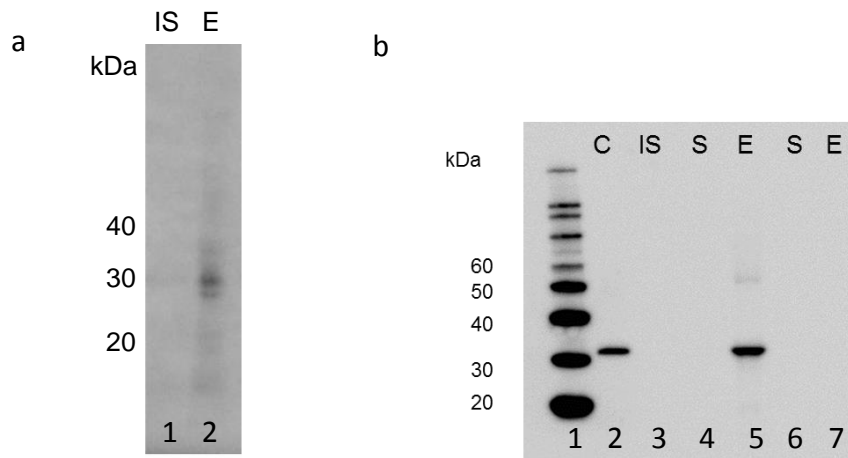

**Figure S6. a** Nanotrap particle preprocessing step is necessary to detect an OspA specific band in the urine of patient PD113, clinically positive for Lyme disease. Initial solution (IS) before Nanotrap particle processing. Eluate (E) after Nanotrap particle processing. **b** Positive and negative controls run with all Lyme patient samples. *Lane 2* contains borrelia protein lysate (2 ng) in human urine. *Lane 5* is a positive control 4 ng spiked in 40 mL of urine sample. *Lane 6* and *7* are negative controls of 40 mL of volunteer urine processed through the Nanotrap particles. C=borrelia lysate control, IS=initial solution, S=supernatant, E=eluate.

**Table S1.** Sequences of peptides tested for antibody binding.

| Peptide ID     | Sequence                           | Reactivity with mAb 0551 |
|----------------|------------------------------------|--------------------------|
| OspA peptide 1 | KQNVSSLDEKNSASVDLPGE               | Negative                 |
| OspA peptide 2 | VLKNFTLEGKVANDKTLEV                | Negative                 |
| OspA peptide 3 | EVKEGTVTLSKEIAKSGEVT               | Negative                 |
| OspA peptide 4 | VALNDTNTTQATKKTGAWDS               | Negative                 |
| OspA peptide 5 | KTSTLTISVNSKKTQLVFTK               | Positive                 |
| OspA peptide 6 | QLVFTKQDTITVQKYDSAGT               | Positive                 |
| OspA peptide 7 | NLEGTAVEIKTLDELKNALK               | Negative                 |
| OspA219-253    | KTSTLTISVNSKKTQLVFTKQDTITVQKYDSAGT | Positive                 |
| OspA219-235    | KTSTLTISVNSKKTQL                   | Negative                 |
| OspA240-253    | QDTITVQKYDSAGT                     | Negative                 |



**Table S2.** The mAb epitope used herein (red rectangle) is conserved in common pathogenic species of *Borrelia*. BAA22342.1 in *Borrelia garinii* Taxonomy ID 29519, ADD14639.1 in *Borrelia burgdorferi* taxonomy ID 139, WP\_012665647.1 in *Borrelia valaisiana* taxonomy ID 62088, WP\_012665647.1 in *Borrelia* sp. SV1 taxonomy ID 498741 YP\_003110622.1 in *Borrelia burgdorferi* 297 taxonomy ID 521009, NP\_045688.1 in *Borrelia burgdorferi* B31 taxonomy ID 224326, WP\_014023199.1 in *Borrelia bissettii* taxonomy ID 64897, ADG02035.1 in *Borrelia afzelii* taxonomy ID 29518, AAN65460.1 in *Borrelia spielmanii* taxonomy ID 88916. BLAST analysis was performed on the sequence KTSTLTISVNSKTTQLVFTKQDTITVQKYDSAGT (combination of peptide 5 and 6) with the following organisms: *Treponema pertenu* (taxonomy ID 168), *Leptospiraceae* (taxonomy ID 170), *Treponema* (taxonomy ID 157), *Spirochaetes* (taxonomy ID 203691) excluding *Borrelia* (taxonomy ID 138), *Homo sapiens* (taxonomy ID 9606), Epstein-Barr virus EBV (taxid:10376), Human cytomegalovirus (taxid:10359), herpes simplex virus 1 HSV-1 (taxid:10298), hepatitis C virus HCV (taxid:11103), Babesia txid5864, Anaplasma txid768, Ehrlichieae txid942, Bartonella txid773, Rickettsias txid766. No significant similarity found. No homology was identified.

|                |     |                                                                       |
|----------------|-----|-----------------------------------------------------------------------|
| BAA22342.1     | 1   | -----LGIGLILALIACKQNVSSLDEKNSVSVDLPGEMKVLVSKEKDKDGKYSLMA              |
| ADD14639.1     | 1   | -----ILALIACKQNVSSLDEKNSVSVDLPGEMKVLVSKEKNDGKYDLIA                    |
| WP_012672372.1 | 1   | MKKYLLGIGLILALIACKQNVSSLDEKNSVSVDLPGEIKVLVSKEKNDGKYSLMA               |
| WP_012665647.1 | 1   | MKKYLLGIGLILALIACKQNVSSLDEKNSASVDLPGEMKVLVSKEKDKDGKYSLVA              |
| YP_003110622.1 | 1   | MKKYLLGIGLILALIACKQNVSSLDEKNSVSVDLPGEMKVLVSKEKNDGKYDLIA               |
| NP_045688.1    | 1   | MKKYLLGIGLILALIACKQNVSSLDEKNSVSVDLPGEMKVLVSKEKNDGKYDLIA               |
| WP_014023199.1 | 1   | MKKYLLGIGLILALIACKQNVSGLDEKNSVSVDLPGEMKVLVSKEKDKDGKYSLMA              |
| ADG02035.1     | 1   | -----ALIACKQNVSSLDEKNSASVDLPGEMKVLVSKEKDKDGKYSLKA                     |
| AAN65460.1     | 1   | -----ILALIACKQNVSGLDEKNSTVDVPGELKVLVSKEKDKDGKYSLMA                    |
| BAA22342.1     | 52  | TVDKLELKGTSDKNSGSGILEGVKTDKSKAKLTI SDDL SKTTFEVFKEDGKTLVSR            |
| ADD14639.1     | 47  | TVDKLELKGTSDKNNGSGVLEGVKADKSKVKLTI SDDL GQTTLEVFKEGKTLVSK             |
| WP_012672372.1 | 57  | TVDKLELKGTSDKNNGSGVLEGVKADKSKVKLTVSDDL GQTTLEVLKEDGKTLVSR             |
| WP_012665647.1 | 57  | TVDKVELKGTSDKNNGSGTLEGVKDDKSKVKLTI SDDLGETKLETFKEDG-TLVSR             |
| YP_003110622.1 | 57  | TVDKLELKGTSDKNNGSGVLEGVKADKSKVKLTI SDDL GQTTLEVFKEGKTLVSK             |
| NP_045688.1    | 57  | TVDKLELKGTSDKNNGSGVLEGVKADKSKVKLTI SDDL GQTTLEVFKEGKTLVSK             |
| WP_014023199.1 | 57  | TVDKLELKGTSDKNNGSGILEGVKADKSKVKLTVSEDLSTTTLEVLKEDGKTLVSK              |
| ADG02035.1     | 45  | TVDKIELKGTSDKDNGSGVLEGTDKDKSKAKLTIADDL SKTTFELFKEDGKTLVSR             |
| AAN65460.1     | 47  | TVDKLELKGTSDKNDGSGVLEGVKADKSKVKLTI SDHLSKTTFEVFKEDGKTLVSR             |
| BAA22342.1     | 108 | KVNSKDKSSTEEKFNAGELSEKVVTRANGNRLEYTEI-KSDGSGKAKEVLKDFTL               |
| ADD14639.1     | 103 | KVTSKDKSSTEEKFNEKGEVSEKI ITRADGTRLEYTEI-KSDGSGKAKEVLKG-YV             |
| WP_012672372.1 | 113 | KVTSKDKSSTEEKFNEKGELAEKIMTRANGTRLEYTEI-KSDGSGKAKEVLKD-YV              |
| WP_012665647.1 | 112 | KVNFKDKSFTEEFNEKGEVSEKI LTRSNGTTLEYSQMTDAENATKAVETLKN <sub>g</sub> IK |
| YP_003110622.1 | 113 | KVTSKDKSSTEEKFNEKGEVSEKI ITRADGTRLEYTEI-KSDGSGKAKEVLKG-YV             |
| NP_045688.1    | 113 | KVTSKDKSSTEEKFNEKGEVSEKI ITRADGTRLEYTGI-KSDGSGKAKEVLKG-YV             |
| WP_014023199.1 | 113 | KTTSKDKSSTEEKFNDKGELAEKTI VRANGTRLEYTEV-KSDGSGKAKETLKD-YA             |
| ADG02035.1     | 101 | KVSSKDKTSTDEMFNEKGELSAKTM TRENGTKLEYTEM-KSDGTGKAKEVLKN-FT             |
| AAN65460.1     | 103 | NVNSKDKSSTKEKFNEKGELSEKTLVRANGTKLEYTEI-KSDGTGKAKEVLKD-FT              |
| BAA22342.1     | 163 | LEGTLTADKTTTLTIQEGSVTL SKNIAKSGEITVELNDTDSS-GDKKSGQWNSSTST            |
| ADD14639.1     | 157 | LEGTLTAEKTTLVVKEGTVTL SKNISKSGEVSVELNDTDSSAATKKTAAWNSGTST             |
| WP_012672372.1 | 167 | LEGTLTAEKTTLVVKEGTVTL SKHISKSGEVTAEELNDTESSATKKTAAWNSGTST             |
| WP_012665647.1 | 168 | LPGNLVGGKTTLKI TEGTVTL SKHIAKSGEVTVEINDTSSTPNTKKTGKWDARNST            |
| YP_003110622.1 | 167 | LEGTLTAEKTTLVVKEGTVTL SKNISKSGEVSVELNDTDSSAATKKTAAWNSGTST             |
| NP_045688.1    | 167 | LEGTLTAEKTTLVVKEGTVTL SKNISKSGEVSVELNDTDSSAATKKTAAWNSGTST             |
| WP_014023199.1 | 167 | LEGTLTAEKATLVVKEGTVTL SKHISKSGEVTAEELNDTDSAQATKKTGKWDAGTST            |
| ADG02035.1     | 155 | LEGKVANDKVTLEVKEGTVTL SKEIAKSGEVTVALNDTNTTQATKKTGAWDSKTST             |
| AAN65460.1     | 157 | LEGTLANEKATLVVKEGTVTL SKNIDKSGEVTVALNDTDSTAATKKTGAWDSKTST             |
| BAA22342.1     | 218 | LTISAKSKTKDI VFTKQDTITVQKYDSAGTNLEGS AVEIKTLDELKNALK                  |
| ADD14639.1     | 213 | LTITVNSKTKDI VFTKENTITVQQYDSNGTKLEGS AVEITKLDEIKNALR                  |
| WP_012672372.1 | 223 | LTITVNSKTKDI VFTKENTITVQKYDTAGTNLEGS AVEIKKLDELKNALK                  |
| WP_012665647.1 | 224 | LTII VDSKNKTKI VFTKQDTITVQSYNPAGNKLEGT AVEIKTLQELKNALK                |
| YP_003110622.1 | 223 | LTITVNSKTKDI VFTKENTITVQQYDSNGTKLEGS AVEITKLDEIKNALK                  |
| NP_045688.1    | 223 | LTITVNSKTKDI VFTKENTITVQQYDSNGTKLEGS AVEITKLDEIKNALK                  |
| WP_014023199.1 | 223 | LTISVNSKTKNI VFTKQDTITVQKYDSAGTNLEGT AVEIKTLDELKNALK                  |
| ADG02035.1     | 211 | LTISVNSKTTQI VFTKQDTITVQKYDSAGTNLEGT AVEIKTLDELKNA--                  |
| AAN65460.1     | 213 | LTITVNSKTKDI VFTKQDTITVQKYDSAGTNLEGS AVEIK-----                       |



**Table S3.** Light scattering analysis of Nanotrap particles

| Rept#   | Mean [nm]           | P.I.                | Diff.Coeff [m <sup>2</sup> /s] | Counts/s | Baseline error |
|---------|---------------------|---------------------|--------------------------------|----------|----------------|
| 1       | 1097.4              | -1.065              | 4.47e-13                       | 1.02e+5  | 4.50%          |
| 2       | 1042.8              | -1.230              | 4.70e-13                       | 1.01e+5  | 1.21%          |
| 3       | 1024.0              | -1.422              | 4.79e-13                       | 9.95+4   | 0.33%          |
| Average | 1054.7 +/-<br>31.11 | -1.239 +/-<br>0.146 |                                |          |                |

**Table S4.** Quantification of the amount of Remazol brilliant blue (RBB) dye covalently bound to the Nanotrap particles and percentage of reacted acrylic acid (AAc) moles. This information was obtained and recorded for every batch of produced Nanotrap particles (example batch # RM37B4 is reported here).

| <b>Parameter</b>                                             | <b>Numerical value</b> | <b>Unit of Measure</b> |
|--------------------------------------------------------------|------------------------|------------------------|
| Weight of 20 mL of freeze dried poly(NIPAm-co-AAc) Nanotrap* | 110                    | mg                     |
| Weight of 20 mL of freeze dried poly(NIPAm/RBB) Nanotrap     | 153                    | mg                     |
| $\Delta$ weight                                              | 43                     | mg                     |
| Molar quantity of RBB covalently bound to the Nanotrap       | 0.0686                 | mmol                   |
| Molar quantity of AAc in the poly(NIPAm-co-AAc) Nanotrap     | 0.2430                 | mmol                   |
| Percentage of mol RBB bound to AAc / tot mol AAc             | 28                     | %                      |

\*Note: The weight is relative to the poly(NIPAm-co-AAc) Nanotrap before RBB covalently binding.

**Table S5.** Clinical and diagnostic information of patients suspected of having early stage Lyme disease N=51 (N= 117 healthy volunteers were recruited under informed consent and included in the study).

Treatment: Dx = doxycycline, Pd = prednisone, Rc = rocepherin, sv = synovectomy, st = steroids, Am = amoxil, Zm = Zithromax. Urine collection timing and presence of symptoms: B = before treatment, PT = during or after treatment, symptoms present at the time urine was collected.

| Patient ID# | Clinical manifestation                                      | Treatment  | Serology results (ELISA, IgG, IgM)<br>N=negative,<br>P=positive,<br>ND=not done | Urine collection timing | OspA urine test (N=negative; P=positive confirmed by competition) |
|-------------|-------------------------------------------------------------|------------|---------------------------------------------------------------------------------|-------------------------|-------------------------------------------------------------------|
| 1           | joint pain, malaise, neck pain, headache, nausea, dizziness | Dx         | N, ND, ND                                                                       | PT                      | N                                                                 |
| 3           | EM, bell's palsy, myalgia                                   | Dx, Pd     | P, N, N                                                                         | PT                      | P                                                                 |
| 8           | myalgia, fever, joint pain                                  | Dx, Rc, Sv | P, P, N                                                                         | PT                      | P                                                                 |
| 11          | EM, Bell's palsy, joint pain                                | Dx, Rc     | N, ND, ND                                                                       | PT                      | P                                                                 |
| 13          | EM, fever, joint pain, neck pain, fatigue                   | Dx         | P, N, P                                                                         | PT                      | P                                                                 |
| 14          | joint pain                                                  | St, Dx     | P, P, ND                                                                        | PT                      | P                                                                 |
| 15          | EM, myalgia, fever, joint pain, malaise, fatigue            | Rc, Pc     | P, N, P                                                                         | PT                      | P                                                                 |
| 17          | joint pain                                                  | Dx, Rc     | P, P, N                                                                         | PT                      | P                                                                 |
| 18          | EM, fever, joint pain                                       | Dx         | P, P, P                                                                         | PT                      | P                                                                 |
| 21          | headaches                                                   | Dx         | N, N, N                                                                         | PT                      | P                                                                 |
| 23          | EM, fever, anthralgiatis                                    | Am         | P, P, P                                                                         | B                       | P                                                                 |
| 24          | EM, fever, anthralgias                                      | Zm         | P, N, P                                                                         | PT                      | P                                                                 |
| 25          | EM, fever, neck pain, fatigue                               | Dx         | P, N, P                                                                         | B                       | P                                                                 |
| 26          | EM, anthralgiatis                                           | Dx, Rc, Am | N, N, N                                                                         | PT                      | P                                                                 |
| 27          | EM, fatigues, anthralgiatis                                 | Dx, Zm     | ND, ND, ND                                                                      | PT                      | P                                                                 |
| 102         | EM                                                          |            | N, ND, ND                                                                       | PT                      | P                                                                 |
| 103         | fatigue, joint pain, pos for Lyme on lumber puncture        | Dx         | P, P, N                                                                         | PT                      | P                                                                 |
| 103.1       | No symptoms                                                 | Rc         | P, P, N                                                                         | -                       | N                                                                 |
| 105         | joint pain, arthritis                                       | Dx         | P, N, N                                                                         | PT                      | P                                                                 |

|       |                                            |    |           |    |   |
|-------|--------------------------------------------|----|-----------|----|---|
| 108   | EM, fever, joint pain                      | Dx | P, N, P   | B  | P |
| 108.1 | no symptoms                                | Dx | P, N, P   | -  | N |
| 113   | EM, fever, neck pain, fatigue              |    | P, N, P   | PT | P |
| 116   | joint pain, fatigue                        |    | N, ND, ND | -  | N |
| 117   | Tick bite                                  |    | N, NA     | B  | P |
| 118   | EM fatigue                                 |    | P, P, P   | B  | P |
| 119   | joint pain, arthritis, fatigue, neurologic | Dx | P, N, P   | PT | P |
| 120   | EM, fever, malaise                         | Dx | P, N, P   | B  | P |
| 120.1 | No symptoms                                | Dx | P, N, P   | -  | N |
| 121   | EM                                         | Dx | N, NA, NA | B  | P |
| 133   | joint pain, fever, fatigue                 |    | N, N, N   | -  | N |
| 139   | joint pain, fatigue                        | Dx | P, N, P   | B  | P |
| 139.1 | No symptoms                                |    | P, N, P   | -  | P |
| 142   | rash joint pain                            |    | P, N, P   | B  | P |
| 148   | joint pain, fatigue                        |    | P, P, P   | B  | P |
| 151   | fatigue                                    | Dx | P, N, N   | PT | P |
| 169   | EM, neck stiffness, migraine               |    | Equivocal | B  | P |
| 180   | EM, tick bite                              | Dx | N, N, N   | B  | P |
| 180.1 | no symptoms                                | Dx | P, N, P   | -  | N |
| 601   | EM                                         | Az | Equiv     | B  | P |
| 601.1 | no symptoms                                | Az | Equiv     | -  | N |
| 602   | EM                                         | Dx | N, ND, ND | B  | P |
| 603   | EM                                         | Dx | P, P, P   | B  | P |
| 604   | EM                                         | Dx | ND        | B  | P |
| 605   | EM                                         | Dx | ND        | B  | P |
| 606   | EM                                         | Dx | ND        | B  | P |
| 607   | EM                                         | Dx | Equiv     | B  | P |
| 608   | EM                                         | Dx | ND        | B  | P |
| 623   | EM                                         | Dx | N, ND, ND | B  | P |
| 623.1 | EM                                         | Dx | N, ND, ND | -  | P |
| 623.2 | EM                                         | Dx | N, ND, ND | -  | N |
| 623.3 | EM                                         | Dx | N, ND, ND | -  | N |
| 623.4 | EM                                         | Dx | N, ND, ND | -  | N |
| 623.5 | EM                                         | Dx | N, ND, ND | -  | N |

**Table S6:** Post treatment patients being evaluated for recurrent or persistent disseminated Lyme disease derived from a Lyme endemic geographic region.

| Patient ID# | Clinical Manifestation | Serology results (IgG, IgM) | OspA urine test (N=negative; P=positive confirmed by competition) |
|-------------|------------------------|-----------------------------|-------------------------------------------------------------------|
| 300         | Neurocognitive         | ND                          | N                                                                 |
| 306         | Neurologic             | ND                          | N                                                                 |
| 309         | Neurologic             | ND                          | N                                                                 |
| 310         | Joint pain             | ND                          | N                                                                 |
| 315         | Joint pain             | ND                          | P                                                                 |
| 318         | Joint pain             | ND                          | N                                                                 |
| 319         | Bladder pain           | ND                          | N                                                                 |
| 320         | Neurologic             | ND                          | N                                                                 |
| 323         |                        | ND                          | P                                                                 |
| 324         | asymptomatic           | ND                          | N                                                                 |
| 327         | Bladder pain           | ND                          | N                                                                 |
| 328         | Bladder pain           | ND                          | P                                                                 |
| 329         | Joint pain             | ND                          | N                                                                 |
| 331         | neurologic             | ND                          | N                                                                 |
| 333         | Bladder pain           | ND                          | N                                                                 |
| 334         | Joint pain             | ND                          | P                                                                 |
| 336         | Fatigue                | ND                          | N                                                                 |
| 337         | Joint pain             | ND                          | P                                                                 |
| 339         | neurologic             | ND                          | P                                                                 |
| 340         | Neurologic             | ND                          | P                                                                 |
| 341         | Joint pain             | ND                          | P                                                                 |
| 343         | Myalgia                | ND                          | N                                                                 |
| 344         | Neurolocognitive       | ND                          | N                                                                 |
| 346         | EM                     | N,P                         | P                                                                 |
| 347         | Neurologic             | ND                          | P                                                                 |
| 348         | Neurologic             | ND                          | N                                                                 |
| 349         | Neurocognitive         | ND                          | P                                                                 |
| 350         | Neurologic             | ND                          | P                                                                 |
| 353         | Neurologic             | ND                          | N                                                                 |
| 355         | Neurologic             | ND                          | N                                                                 |
| 356         | Neurologic             | ND                          | P                                                                 |
| 360         | Joint pain             | ND                          | P                                                                 |
| 361         | fatigue                | ND                          | N                                                                 |
| 363         | Joint pain             | ND                          | N                                                                 |
| 364         | Joint pain             | ND                          | N                                                                 |
| 377         | Joint pain             | ND                          | N                                                                 |
| 378         | Neurologic             | ND                          | N                                                                 |
| 379         | Neurologic             | ND                          | P                                                                 |
| 380         | Fatigue                | ND                          | P                                                                 |
| 381         | Joint pain             | ND                          | P                                                                 |

|     |                     |      |   |
|-----|---------------------|------|---|
| 382 | Joint pain          | ND   | P |
| 383 | Neurologic          | ND   | P |
| 384 | Joint pain          | N,N  | P |
| 386 | Joint pain          | ND   | N |
| 388 | Joint pain, fatigue | ND   | P |
| 389 | Joint pain          | ND   | P |
| 390 | Joint pain          | N,N  | P |
| 391 | Joint pain          | N, P | N |
| 392 | Joint pain          | N, N | N |
| 393 | Joint pain          | ND   | P |
| 394 | Joint pain          | N, N | N |
| 397 |                     | ND   | N |
| 400 | EM                  | N, N | N |
| 401 |                     | ND   | N |
| 402 |                     | ND   | N |
| 403 |                     | ND   | N |
| 404 |                     | ND   | N |
| 406 | Neurocognitive      | ND   | N |
| 407 | Joint pain          | N,N  | P |
| 410 |                     | N,N  | P |
| 413 |                     | ND   | N |
| 414 | Joint pain          | ND   | N |
| 416 |                     | ND   | N |
| 417 |                     | ND   | N |
| 419 |                     | ND   | P |
| 421 |                     | ND   | N |
| 424 | Neurologic          | N,N  | N |
| 425 |                     | N,N  | P |
| 426 |                     | ND   | N |
| 427 | EM, joint pain      | N,N  | P |
| 429 | Neurologic          | ND   | N |
| 430 | Neurocognitive      | ND   | N |
| 431 | Neurologic          | ND   | N |
| 433 | Joint pain          | ND   | N |
| 435 | Neurocognitive      | ND   | N |
| 437 |                     | ND   | P |
| 438 | Joint pain          | ND   | P |
| 439 | Joint pain          | ND   | P |
| 443 | Myocarditis         | ND   | P |
| 446 | Neurocognitive      | ND   | N |
| 452 | Myalgia             | ND   | N |
| 458 | Joint pain          | ND   | N |
| 459 |                     | ND   | N |
| 465 |                     | ND   | N |
| 466 | Joint pain          | ND   | N |
| 469 |                     |      | P |
| 470 |                     |      | N |

|     |                                 |    |   |
|-----|---------------------------------|----|---|
| 478 |                                 | ND | N |
| 487 | Neurocognitive,<br>Fatigue      | ND | N |
| 488 | Neurocognitive,<br>Neurological | ND | P |
| 489 | Joint pain, Fatigue             | ND | P |
| 490 |                                 | ND | P |
| 491 |                                 | ND | N |
| 492 | Fatigue                         | ND | P |
| 493 | Neurocognitive                  | ND | N |
| 495 | Neurocognitive                  | ND | P |
| 497 |                                 | ND | P |
| 498 | Neurocognitive                  | ND | N |
| 499 |                                 | ND | N |
| 500 |                                 | ND | N |
| 501 | Joint pain                      | ND | P |

1. Casjens SR, Fraser-Liggett CM, Mongodin EF, Qiu WG, Dunn JJ, Luft BJ, Schutzer SE: **Whole genome sequence of an unusual *Borrelia burgdorferi sensu lato* isolate.** *J Bacteriol* 2011, **193**:1489-1490.
2. Stanek G, Reiter M: **The expanding Lyme *Borrelia* complex--clinical significance of genomic species?** *Clin Microbiol Infect* 2011, **17**:487-493.
